# Supplementary material for: Fused Tetrahydroquinolines Are Interfering with Your Assay
Source: PubMed Central journal article supplement — J Med Chem. 2023 Oct 24;66(21):14434–46. doi: 10.1021/acs.jmedchem.3c01277 (PMC10641811; doi:10.1021/acs.jmedchem.3c01277), 2023-10-24
Supplement: jm3c01277_si_001.pdf [file jm3c01277_si_001.pdf]

# Supporting Information

## Fused Tetrahydroquinolines are Interfering with Your Assay

Frances M. Bashore<sup>1,†</sup>, Joel Annor-Gyamfi<sup>1,†</sup>, Yuhong Du<sup>2</sup>, Vittorio Katis<sup>3</sup>, Felix Nwogbo<sup>4</sup>, Raymond G. Flax<sup>1</sup>, Stephen V. Frye<sup>4</sup>, Kenneth H. Pearce<sup>4</sup>, Haian Fu<sup>2</sup>, Timothy M. Willson<sup>1</sup>, David H. Drewry<sup>1,5</sup>, Alison D. Axtman<sup>\*,1</sup>

<sup>1</sup>Structural Genomics Consortium, UNC Eshelman School of Pharmacy, University of North Carolina at Chapel Hill, Chapel Hill, NC, 27599, USA

<sup>2</sup>Department of Pharmacology and Chemical Biology, Emory University School of Medicine, Atlanta, GA 30322, USA; Emory Chemical Biology Discovery Center, Emory University School of Medicine, Atlanta, GA 30322, USA

<sup>3</sup>Alzheimer's Research UK Oxford Drug Discovery Institute, Centre for Medicines Discovery, Nuffield Department of Medicine Research Building, Old Road Campus, University of Oxford, Oxford, OX3 7FZ, UK

<sup>4</sup>UNC Eshelman School of Pharmacy, Division of Chemical Biology and Medicinal Chemistry, Center for Integrative Chemical Biology and Drug Discovery, Chapel Hill, NC 27599, USA

<sup>5</sup>UNC Lineberger Comprehensive Cancer Center, School of Medicine, University of North Carolina at Chapel Hill, Chapel Hill, NC, 27599, USA

† Authors contributed equally

\* Corresponding Author E-mail: [Alison.Axtman@unc.edu](mailto:Alison.Axtman@unc.edu)

## Table of Contents

|                           |        |
|---------------------------|--------|
| TR-FRET protocol          | S2     |
| Figure S1                 | S2     |
| Figure S2                 | S3     |
| Figure S3                 | S3     |
| Chemistry experimental    | S3     |
| Spectra for all compounds | S6–S11 |
| Reference                 | S12    |

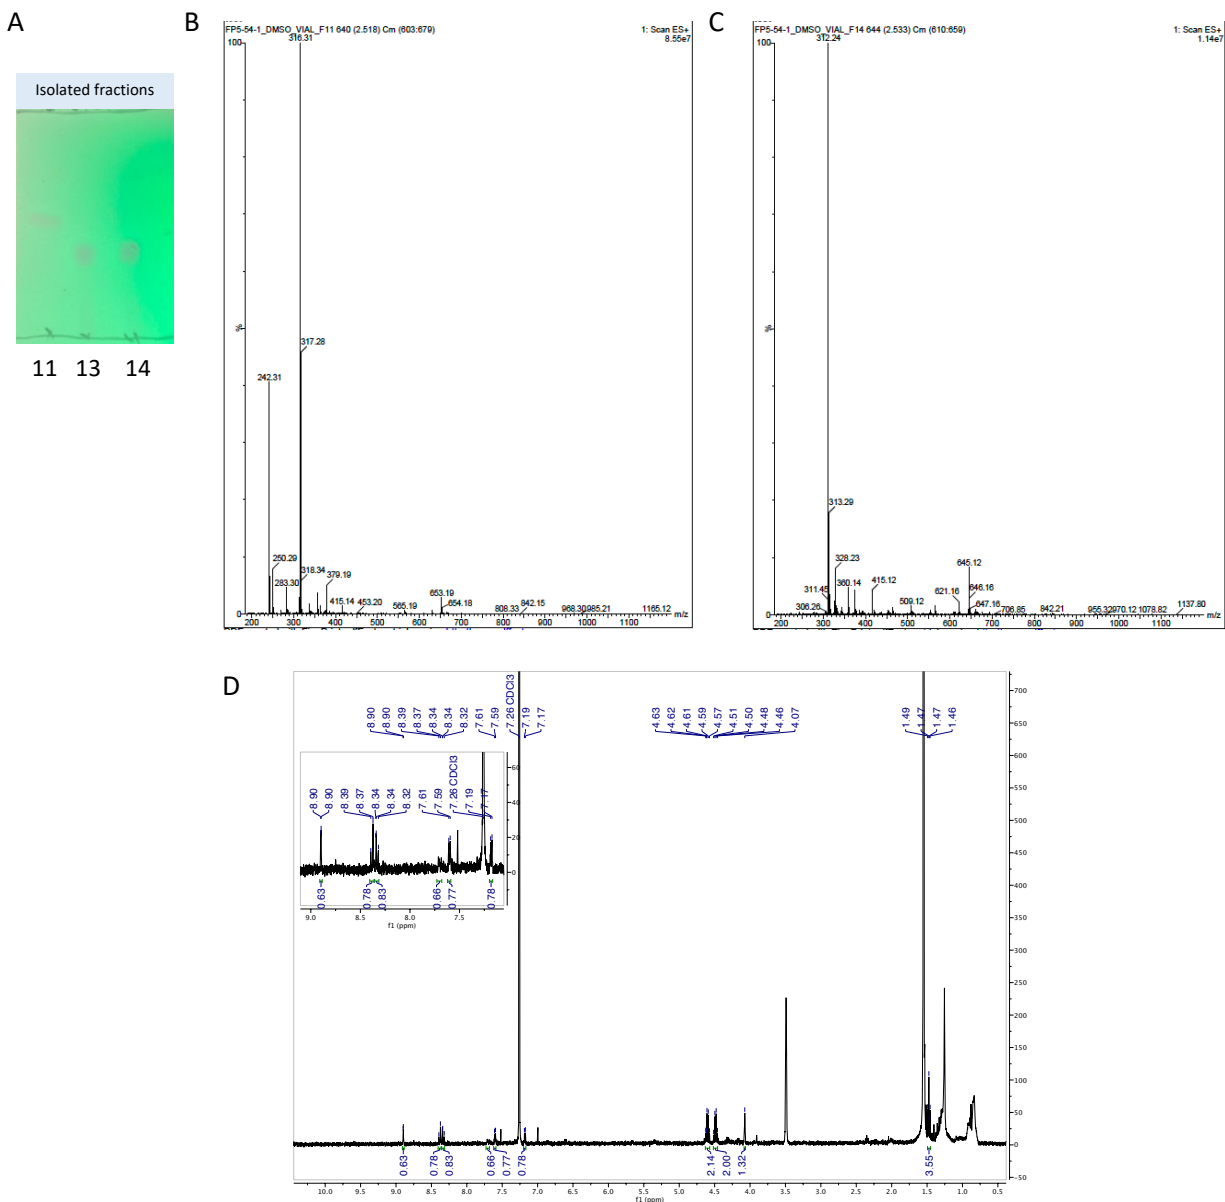

**Figure S1.** Isolated decomposition products from fused THQs kept in solution exposed to light. (A) Thin layer chromatography analysis (eluent: 20% ethyl acetate/80% hexane) of separated fractions following purification of decomposed THQ (5 mg) via silica column chromatography. LCMS data collected from (B) fraction 11 corresponding to fused THQ **1** and (C) fraction 14 corresponding to THQ decomposition product **1b**. (D)  $^1\text{H}$  NMR of combined fractions 13 and 14 from panel A in  $\text{CDCl}_3$ , corresponding to the major decomposition product of **1**.

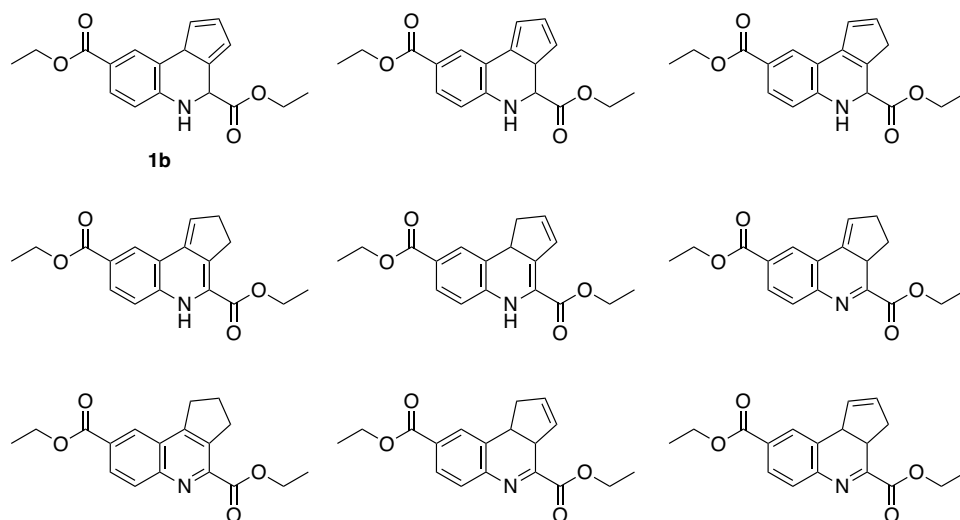

Figure S2. Potential alternative structures of **1b**.

## Biology Experimental

### MSN TR-FRET assay

A time-resolved fluorescence resonance energy transfer (TR-FRET) assay was established to measure the binding of CD44 peptide to MSN. Taking advantage of the interaction of 6His-tagged MSN and biotinylated CD44 peptide, a europium-labeled anti-His antibody and streptavidin-XL665 antibody enabled FRET (Figure S3). This was a slight modification of the previously

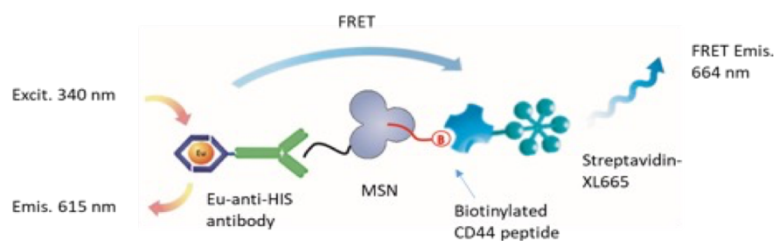

Figure S3. TR-FRET assay scheme.

developed TR-FRET assay for the protein pair.<sup>1</sup> The assay buffer was composed of 25 mM HEPES [pH 7.5], 200 mM NaCl, 0.05% Tween-20, and 1mM DTT, and then filtered. The donor fluorophore was LANCE Eu-W1024 Anti-6xHis at 1 nM and the acceptor fluorophore was streptavidin Alexa 647 at 10 nM.

## Chemistry Experimental

*Diethyl 3a,4,5,9b-tetrahydro-3H-cyclopenta[c]quinoline-4,8-dicarboxylate (1)*. To a 10 mL round-bottom flask equipped with a reflux condenser was added ethyl 4-aminobenzoate (0.36 g, 2.15 mmol), ethyl glyoxalate (50% solution in toluene, 426  $\mu$ L, 4.30 mmol) and sodium sulfate (0.46 g, 3.23 mmol) in toluene (3 mL), and the reaction was heated to 110  $^{\circ}$ C for 30 min. The reaction was cooled, filtered and the solvent was concentrated *in vacuo*. The oily residue, ethyl (*E/Z*)-4-((2-ethoxy-2-oxoethylidene)amino)benzoate, was used in the next step without further purification.

Ethyl (*E/Z*)-4-((2-ethoxy-2-oxoethylidene)amino)benzoate (1.50 g, 6.02 mmol) and acetonitrile (2.5 mL) were charged to a 50 mL round-bottom flask. The flask was fitted with a

septum and purged with nitrogen balloon. Boron trifluoride etherate (149  $\mu$ L, 1.20 mmol) was added via syringe, followed by the addition of freshly distilled cyclopentadiene (988  $\mu$ L, 12.04 mmol) and the reaction was stirred at room temperature for 2 h. The reaction mixture was diluted with H<sub>2</sub>O and extracted with EtOAc (3 x 15 mL). The combined organic layers were washed with brine, dried with Na<sub>2</sub>SO<sub>4</sub> and the solvent was concentrated *in vacuo*. The crude material was purified by column chromatography (SiO<sub>2</sub>, 0–100% EtOAc in hexane) to afford **1** as an off-white solid (950 mg, 50%). <sup>1</sup>H NMR (400 MHz, CDCl<sub>3</sub>):  $\delta$  7.73 – 7.69 (m, 1H), 7.67 (dd, *J* = 8.3, 2.0 Hz, 1H), 6.61 (d, *J* = 8.4 Hz, 1H), 5.81 (ddt, *J* = 5.8, 2.9, 1.5 Hz, 1H), 5.66 (dd, *J* = 5.8, 2.4 Hz, 1H), 4.38 – 4.19 (m, 5H), 4.16 (d, *J* = 3.6 Hz, 1H), 4.12 – 4.08 (m, 1H), 3.36 (tt, *J* = 9.0, 4.4 Hz, 1H), 2.48 – 2.40 (m, 1H), 2.33 (ddt, *J* = 11.9, 9.0, 3.4 Hz, 1H), 1.37 – 1.34 (m, 3H), 1.34 – 1.31 (m, 3H). <sup>13</sup>C NMR (101 MHz, CDCl<sub>3</sub>)  $\delta$  171.42, 166.69, 147.89, 134.15, 130.72, 129.88, 128.51, 124.77, 120.68, 114.79, 61.46, 60.31, 55.61, 45.78, 40.61, 32.49, 14.44, 14.25. HPLC Purity: >95%. LCMS (ESI) for [M+H]<sup>+</sup> (C<sub>18</sub>H<sub>22</sub>NO<sub>4</sub>): 316.15, found: 316.44.

*Diethyl 2,3,3a,4,5,9b-hexahydro-1H-cyclopenta[c]quinoline-4,8-dicarboxylate (2)*. To a 10 mL round-bottom flask was added the tetrahydroquinoline ester derivative (**1**, 50 mg) and ethanol (2.5 mL). The flask was fitted with a septum and purged with nitrogen balloon. Palladium on carbon (10% w/w, 5 mg, 0.02 mmol) was added and the mixture was run under hydrogen at room temperature for 24 h. Filtration of the dark solid through celite gave a liquid residue which was concentrated *in vacuo* to afford the desired reduced product (**2**) as an off-white solid (49 mg, 98%). <sup>1</sup>H NMR (400 MHz, CDCl<sub>3</sub>)  $\delta$  7.79 (s, 1H), 7.66 (d, *J* = 8.4 Hz, 1H), 6.54 (d, *J* = 8.4 Hz, 1H), 4.69 (s, 1H), 4.36 – 4.18 (m, 5H), 4.13 (d, *J* = 3.4 Hz, 1H), 3.39 (s, 1H), 2.81 (d, *J* = 9.0 Hz, 1H), 2.13 – 2.04 (m, 1H), 1.92 (s, 1H), 1.53 – 1.44 (m, 3H), 1.33 (dt, *J* = 14.1, 7.1 Hz, 6H). <sup>13</sup>C NMR (101 MHz, CDCl<sub>3</sub>)  $\delta$  171.8, 166.9, 147.2, 130.9, 128.6, 124.3, 120.1, 113.9, 61.4, 60.3, 54.9, 40.9, 40.1, 34.6, 24.5, 23.3, 14.4, 14.2. HPLC Purity: >95%. LCMS (ESI) for [M+H]<sup>+</sup> (C<sub>18</sub>H<sub>24</sub>NO<sub>4</sub>): 318.16, found: 318.31.

**General Procedure for Saponification:** To a 50 mL round-bottom flask was suspended the tetrahydroquinoline ester derivative (**1** or **2**, 50 mg) in 1M LiOH (5 mL). THF or MeOH was added until a clear solution remained. The reaction mixture was stirred for 4 h at room temperature and then neutralized with 1N HCl (10 mL). Extraction with EtOAc (3 x 20 mL) gave the combined organic layers which were washed with brine, dried with Na<sub>2</sub>SO<sub>4</sub>, and concentrated *in vacuo* to yield the desired product.

*3a,4,5,9b-Tetrahydro-3H-cyclopenta[c]quinoline-4,8-dicarboxylic acid (5661118)*. Compound **1** (50 mg, 0.16 mmol) was dissolved in MeOH and saponified as described in the general procedure above to yield **5661118** as a light brown solid (39 mg, 95%). <sup>1</sup>H NMR (400 MHz, DMSO-*d*<sub>6</sub>)  $\delta$  12.51 (s, 2H), 7.52 (s, 1H), 7.43 (dd, *J* = 8.4, 2.1 Hz, 1H), 6.79 (d, *J* = 8.4 Hz, 1H), 6.09 (s, 1H), 5.83 – 5.78 (m, 1H), 5.61 (d, *J* = 6.7 Hz, 1H), 4.06 (d, *J* = 3.3 Hz, 1H), 4.01 (d, *J* = 8.3 Hz, 1H), 3.17 – 3.09 (m, 1H), 2.33 – 2.16 (m, 2H). <sup>13</sup>C NMR (101 MHz, DMSO-*d*<sub>6</sub>)  $\delta$  172.68, 167.43, 149.08, 134.85, 130.37, 129.39, 127.86, 123.65, 119.03, 114.70, 54.45, 44.93, 40.28, 32.10. HPLC Purity: >95%. LCMS (ESI) for [M+H]<sup>+</sup> (C<sub>14</sub>H<sub>14</sub>NO<sub>4</sub>): 260.08, found: 260.14.

*2,3,3a,4,5,9b-Hexahydro-1H-cyclopenta[c]quinoline-4,8-dicarboxylic acid (3)*. Compound **2** (50 mg, 0.16 mmol) was dissolved in MeOH and saponified as described above to yield **3** as a tan solid (34 mg, 82%). <sup>1</sup>H NMR (400 MHz, DMSO-*d*<sub>6</sub>)  $\delta$  12.43 (s, 2H), 7.57 (s, 1H), 7.43 (dd, *J* = 8.4, 2.0

Hz, 1H), 6.72 (d,  $J = 8.4$  Hz, 1H), 6.23 (s, 1H), 4.04 (d,  $J = 3.4$  Hz, 1H), 2.67 – 2.59 (m, 1H), 2.03 (dq,  $J = 15.0, 7.9$  Hz, 1H), 1.86 – 1.21 (m, 6H).  $^{13}\text{C}$  NMR (101 MHz, DMSO- $d_6$ )  $\delta$  173.41, 167.98, 148.87, 130.61, 128.48, 123.25, 118.78, 114.07, 54.15, 40.78, 34.26, 24.57, 23.09. HPLC Purity: >95 %. LCMS (ESI) for  $[\text{M}+\text{H}]^+$  ( $\text{C}_{14}\text{H}_{16}\text{NO}_4$ ): 262.10, found: 262.15.

Diethyl 3a,4,5,9b-tetrahydro-3H-cyclopenta[c]quinoline-4,8-dicarboxylate (**1**)  
<sup>1</sup>H NMR Analysis

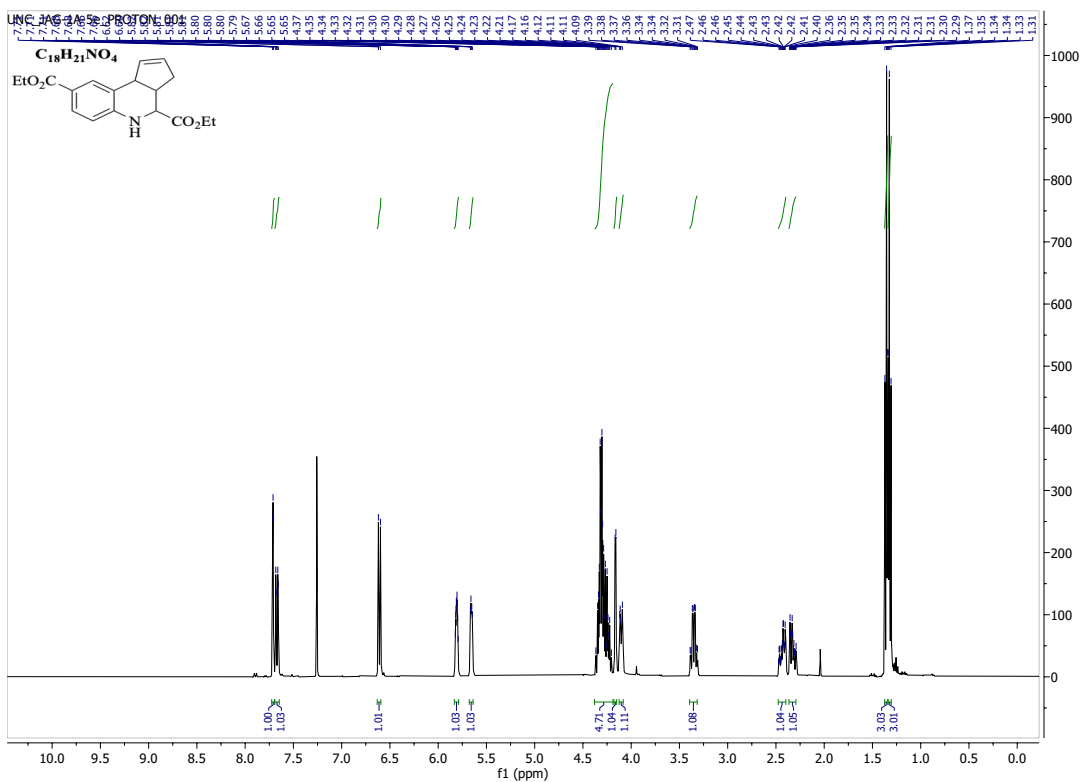

<sup>13</sup>C NMR Analysis

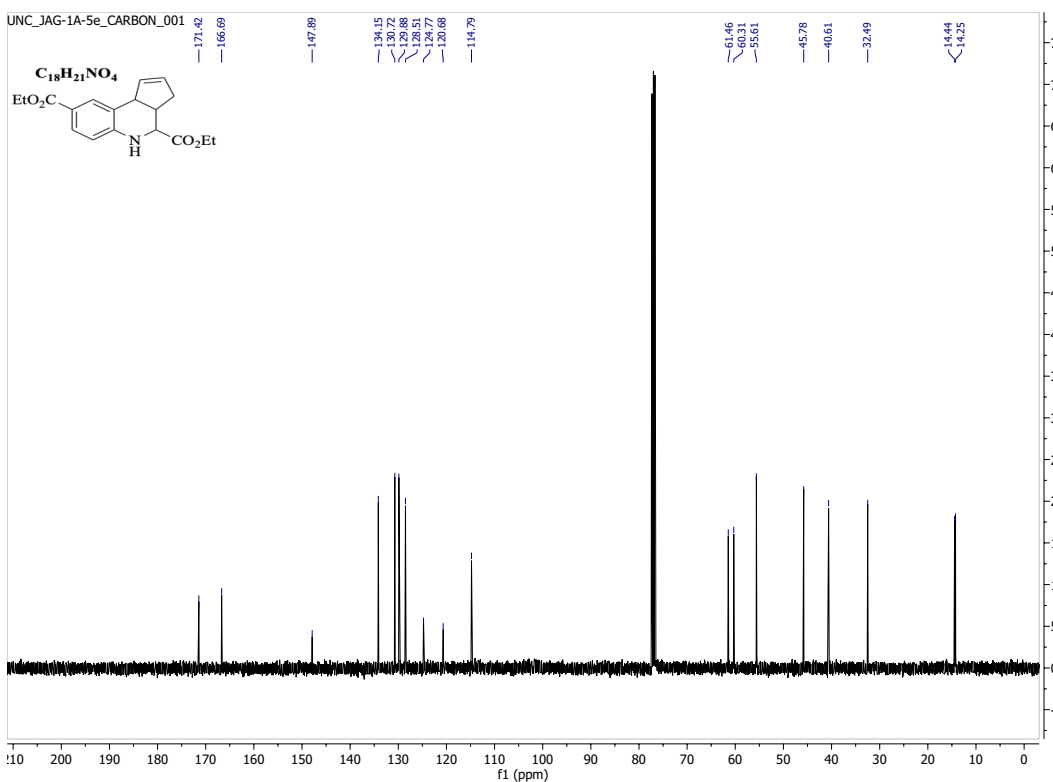

# LCMS Analysis

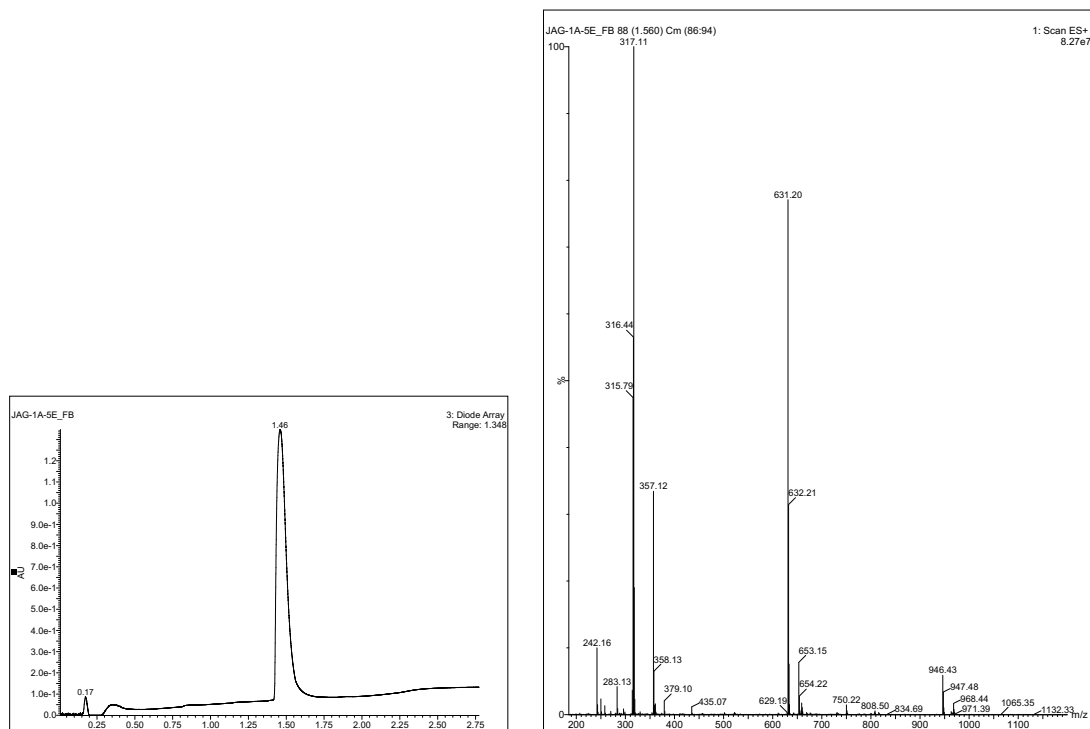

*Diethyl 2,3,3a,4,5,9b-hexahydro-1H-cyclopenta[c]quinoline-4,8-dicarboxylate (2).*

## <sup>1</sup>H NMR Analysis

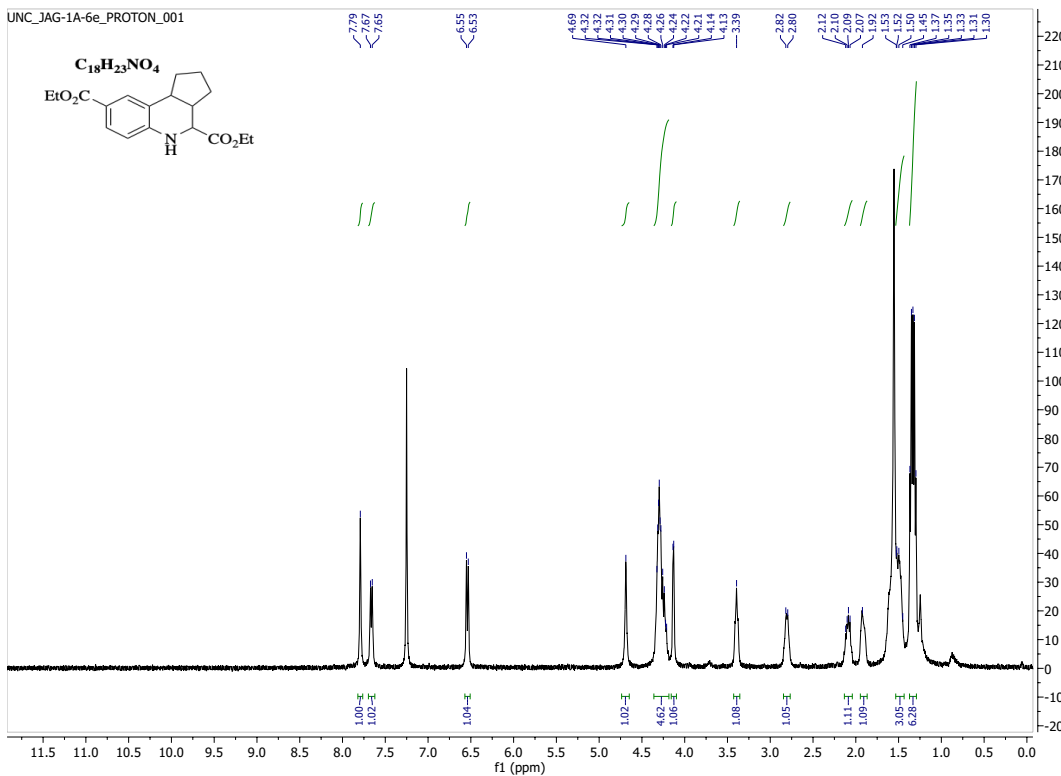

# <sup>13</sup>C NMR Analysis

UNC\_JAG-1A-6e\_CARBON\_001

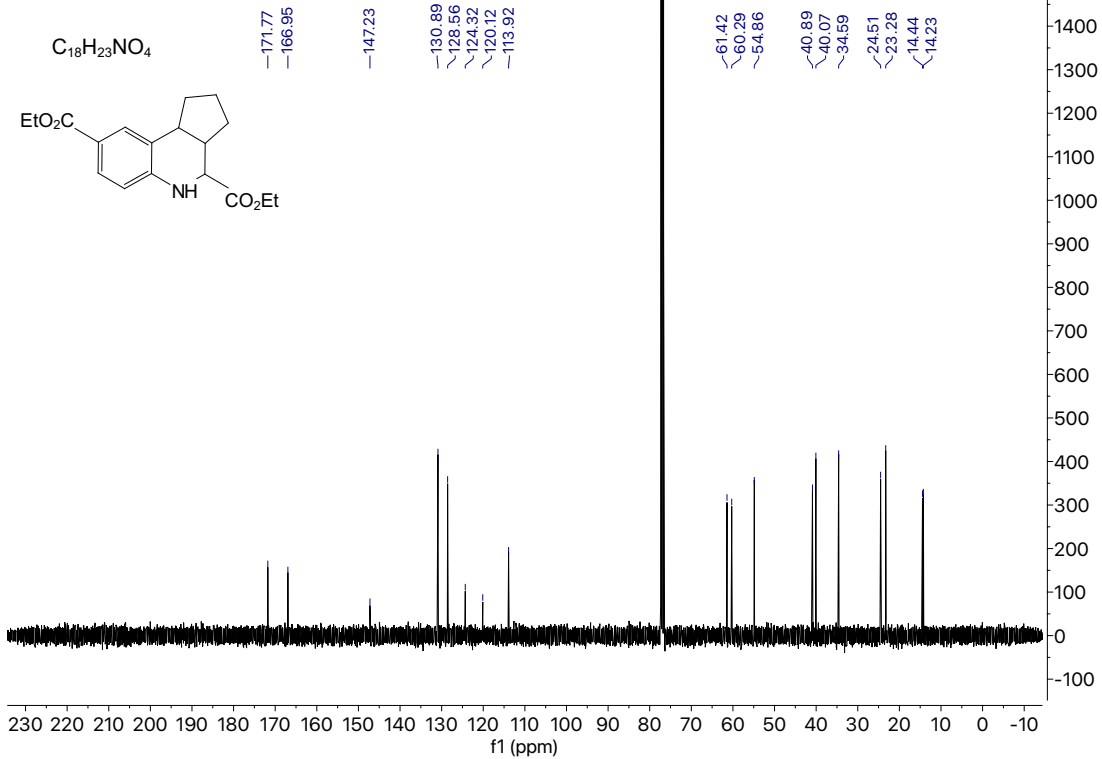

# LCMS Analysis

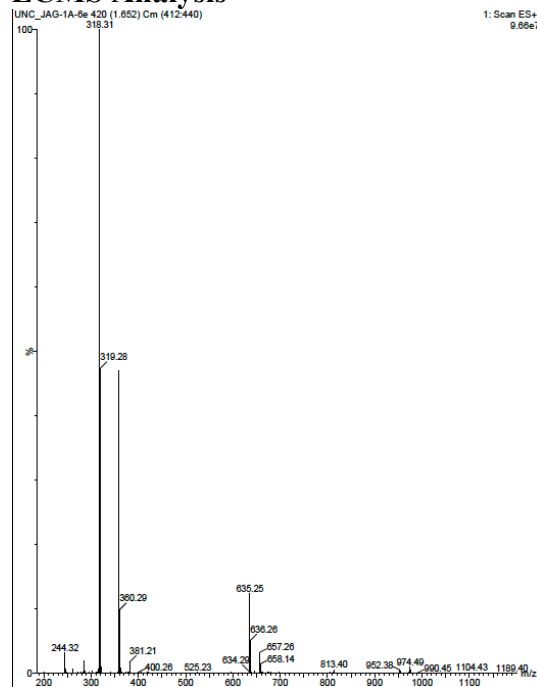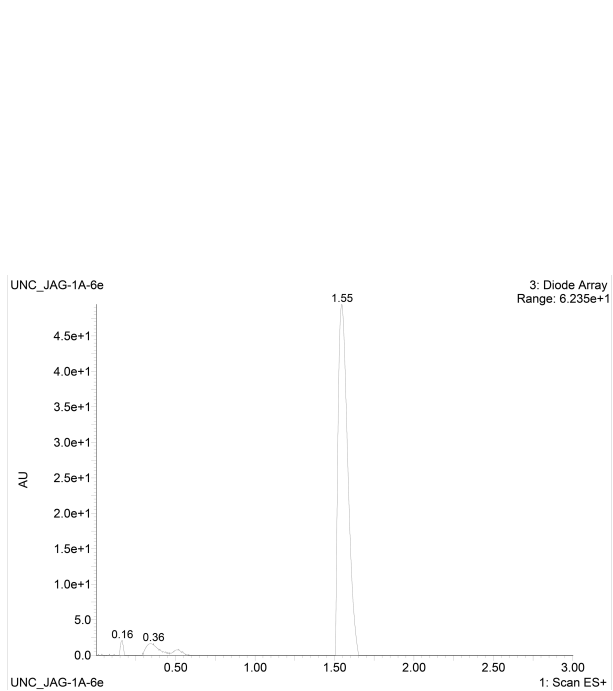



2,3,3a,4,5,9b-Hexahydro-1H-cyclopenta[c]quinoline-4,8-dicarboxylic acid (3).  
<sup>1</sup>H NMR Analysis

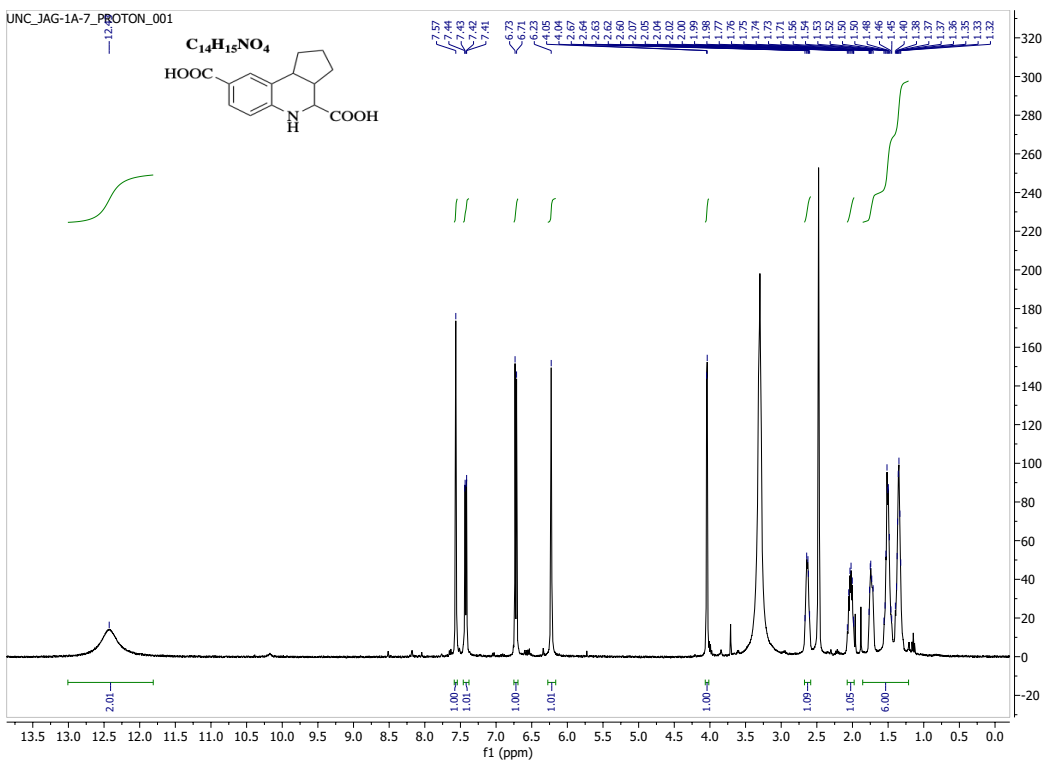

<sup>13</sup>C NMR Analysis

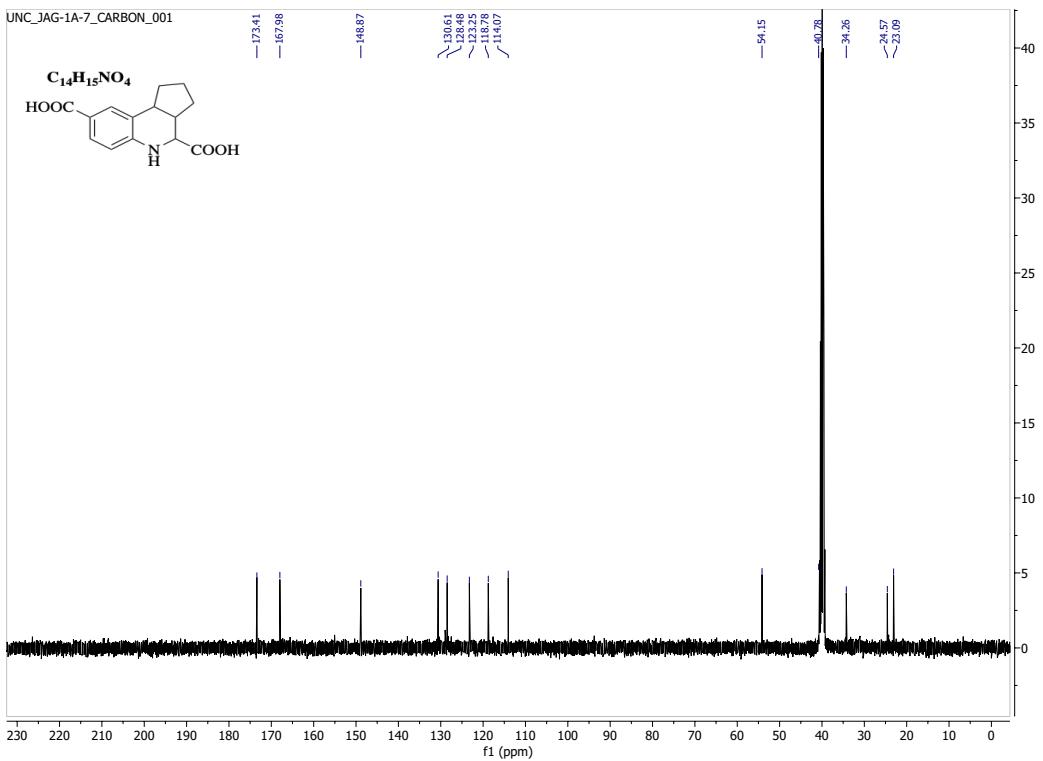

## LCMS Analysis

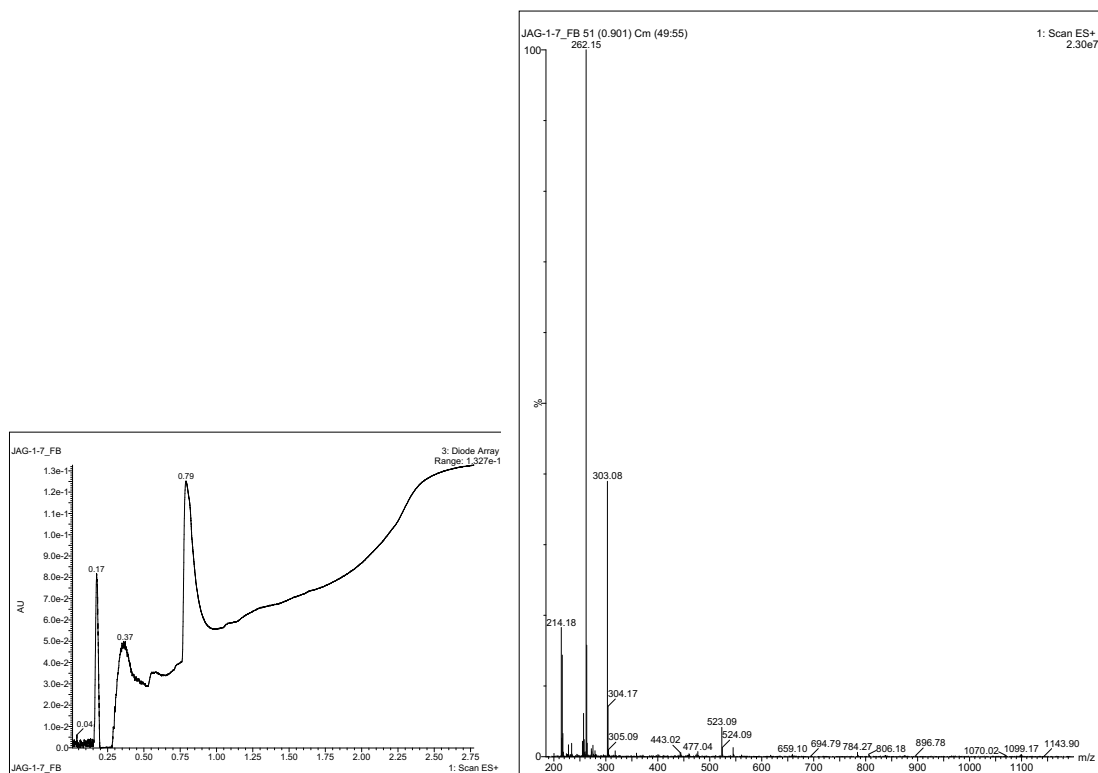

*3a,4,5,9b-Tetrahydro-3H-cyclopenta[c]quinoline-4,8-dicarboxylic acid (5661118).*

## <sup>1</sup>H NMR Analysis

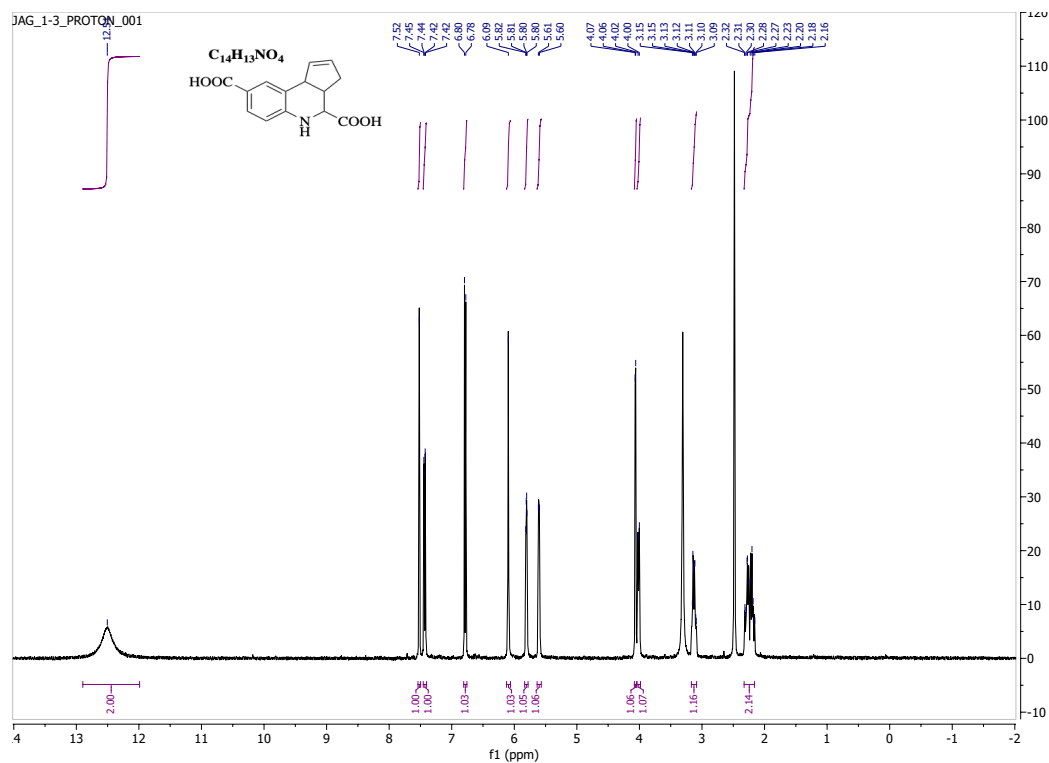

# <sup>13</sup>C NMR Analysis

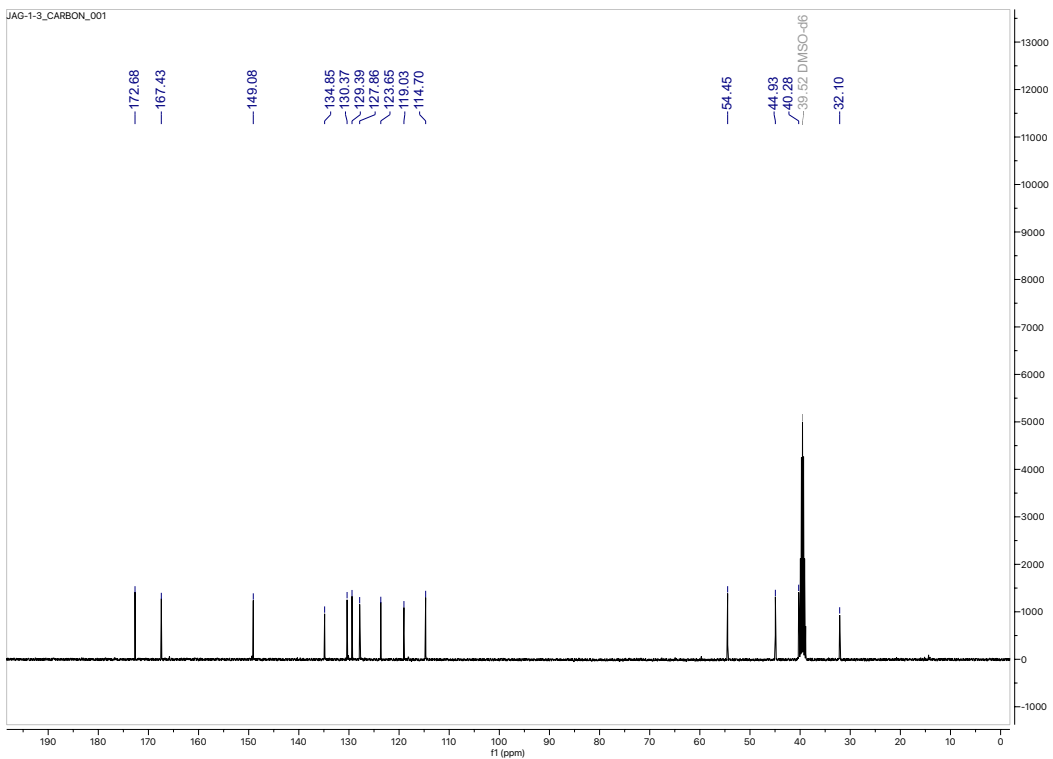

# LCMS Analysis

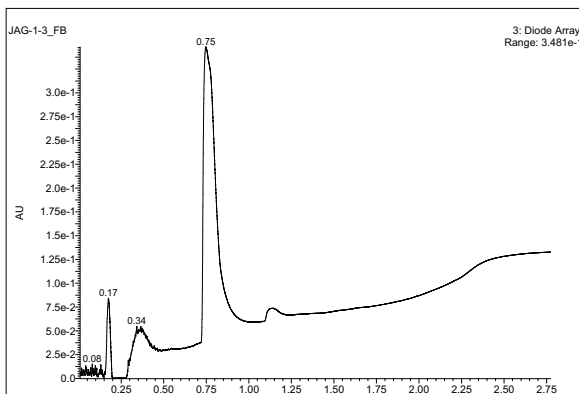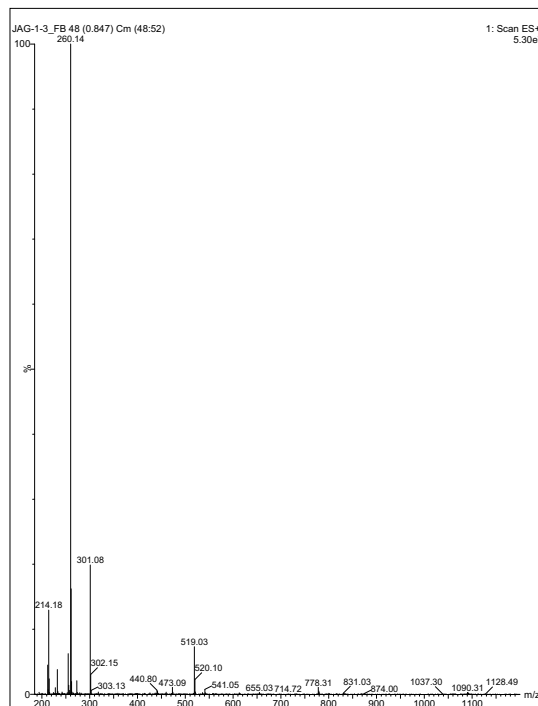

## Reference

1. Du, Y.; Bradshaw, W. J.; Leisner, T. M.; Annor-Gyamfi, J. K.; Qian, K.; Bashore, F. M.; Sikdar, A.; Nwogbo, F. O.; Ivanov, A. A.; Frye, S. V.; Gileadi, O.; Brennan, P. E.; Levey, A. I.; Emory-Sage-SCG TREAT-AD Center; Axtman, A. D.; Pearce, K. H.; Fu, H.; Katis, V. L. Development of FERM domain protein-protein interaction inhibitors for MSN and CD44 as a potential therapeutic strategy for Alzheimer's disease. *BioRxiv* **2023**, 2023.2005.2022.541727. DOI: 10.1101/2023.05.22.541727.
